# Supplementary material
Source: PubMed Central journal article supplement (PMC5285516)
Supplement: NIHMS843812-supplement.pdf [file NIHMS843812-supplement.pdf]

## **SUPPLEMENTARY INFORMATION**

### **Combined activities of JNK1 and JNK2 in hepatocytes**

#### **protect against toxic liver injury**

*Short Title: Redundancy of JNK1 and JNK1 in hepatocytes*

Francisco Javier Cubero; Miguel Eugenio Zoubek; Jin Peng; Wei Hu; Gang Zhao;  
Yulia A. Nevzorova; Malika Al Masaoudi; Lars P. Bechmann; Mark V. Boekschoten;  
Michael Muller; Christian Preisinger; Nikolaus Gassler; Ali E. Canbay; Tom Luedde;  
Roger J. Davis; Christian Liedtke; Christian Trautwein

## **SUPPLEMENTARY MATERIAL AND METHODS**

### *Isolation and culture of primary hepatocytes*

Primary mouse hepatocytes were isolated from 7-8 week-old mice by collagenase perfusion. Living cells were plated on collagen-precoated petri dishes at a density of  $1.5 \times 10^4/\text{cm}^2$  in DMEM medium (PAA Laboratories GmbH, Pasching, Austria) supplemented with L-glutamine, high glucose (4.5 g/l), 10% FBS and 100 U/ml penicillin/streptomycin. After 4 h incubation (37°C, 5% CO<sub>2</sub>) and every 2 days, medium was renewed. Hepatocytes were cultured up to 4 days.

### *Quantitative real-time PCR (qPCR)*

Total RNA from liver tissues or cultured cells was isolated using Trizol reagent (Invitrogen, Karlsruhe, Germany). Due to low RNA amount in cultured cells, RNeasy Lipid Tissue Mini Kit was used to collect and purify RNA. Reverse-transcription was

performed using an Omniscript RT Kit (Qiagen). Relative quantitative gene expression was measured via real-time PCR using a 7300 Real Time PCR System with SDS software 1.3.1 (Applied Biosystems, Foster City, CA) and a SYBR Green PCR Kit (Invitrogen, Carlsbad, CA). GAPDH expression was used as internal standard. Primer sequences can be provided upon request.

#### *Histological evaluation and immunofluorescence staining*

Hepatic tissue were fixed in 4% paraformaldehyde (PFA) immediately after extraction, embedded in paraffin, sectioned and stained for H&E or Sirius red. Samples were reviewed by a blinded pathologist who analyzed the degree of liver injury. The percentage of Sirius red area fraction in all animals was quantified on 10 or 20 low-power (magnification, X10) fields per slide, using the NIH ImageJ® software (<http://rsbweb.nih.gov/>). Immunohistochemistry for CK-19 (DAKO, Hamburg, Germany),  $\alpha$ SMA (Sigma, Steinheim, Germany), phospho-JNK (Cell Signaling, Danvers, MA) and F4/80 (Serotec, Dusseldorf, Germany) on paraffin sections, was performed using a Leica automatic stainer (Wetzlar, Germany). For the immunofluorescence staining, frozen cryosections were incubated with Ki-67 (Santa Cruz, Heidelberg, Germany), Collagen IA1 (Bio trend, Cologne, Germany) or *in situ* cell death detection kit (Roche, Mannheim, Germany) and incubated with fluorescence labelled secondary antibodies (AlexaFluor 488 and 564, Invitrogen, Carlsbad, CA, USA). All fluorescence-labelled cryosections were analyzed and documented using an Imager Z1 fluorescence microscope together with Axiovision software (Carl Zeiss, Jena, Germany).

### *Immunoblot analysis*

Liver tissues were homogenized in ice cold NP40-Buffer containing 50 mM Tris-HCl (pH 7.5), 150 mM NaCl, 0.5% NP-40 and 50 mM NaF freshly supplemented with Complete Mini (Roche), PhosSTOP (Roche), 1 mM orthovanadate and 1 mM pepablock. Protein concentrations were determined by BIO-RAD protein assay (BIORAD). Samples were separated by SDS-PAGE and transferred to a cellulose membrane and probed with antibodies for  $\alpha$ SMA (Sigma), COLLAGEN 1A1 (Monosan, Beutelsbach, Germany), PCNA (Dianova GmbH, Hamburg, Germany), CYCLIN A (Santa Cruz), CYCLIN D1, BCLXL and PKC $\alpha$  (Santa Cruz), JNK1, JNK2, pJNK (pT183/Y185), P38, CMYC, STAT3, pAMPK, AMPK and MAPK/CDK Substrates (PXP\*P or S\*PXR/K) (34B2) (Cell Signaling), and GAPDH (Biorad, Munich, Germany). As secondary antibodies, anti-rabbit-HRP (Cell Signaling) and anti-mouse-HRP (Santa Cruz) were used.

### *Microarray Analysis*

Liver and hepatocyte RNA using TRIzol reagent and purified with the RNeasy Mini Kit (Qiagen, Venlo, The Netherlands) according to the manufacturer's instructions was isolated from 8-10 weeks-old male control *Jnk2*<sup>-/-</sup> and *Jnk* <sup>$\Delta$ hepa</sup> mice. Concentrations and purity of RNA samples were determined on a NanoDrop ND-1000 spectrophotometer (Isogen, Maarssen, The Netherlands). RNA integrity was checked on an Agilent 2100 bioanalyzer (Agilent Technologies, Amsterdam, The Netherlands) with 6000 Nano Chips. RNA samples from 3 mice per experimental group were used for microarray analysis. Samples were hybridized on Affymetrix GeneChip Mouse Genome 430 2.0 arrays in the microarray core laboratory of the Nutrigenomics Consortium at Wageningen University, The Netherlands. Hybridization, washing, and scanning of the arrays were performed according to standard Affymetrix protocols.

Array images were processed using packages from the Bioconductor project<sup>1</sup>. Probe sets were redefined according to Dai<sup>2</sup>. Probes were assigned to unique gene identifiers, in this case Entrez IDs. Arrays were normalized with the Robust Multi-array Average (RMA) method. Differentially expressed probe sets were identified using intensity-based moderated paired t-statistics. *P* values were corrected for multiple testing using a false discovery rate (FDR) method. Detailed descriptions of the applied methods are available on request.

*Peptide lysis, dimethyl-labelling, phosphopeptide enrichment and LC-MS/MS analysis*

Primary hepatocytes were scraped off the cell culture dishes after APAP/DMSO treatment, washed three times in ice-cold PBS and lysed in 8M urea (in 50mM ammonium bicarbonate), containing protease and phosphatase inhibitor cocktails (Serva, Heidelberg, Germany) for 30 min on ice and cleared by centrifugation at 20000 g, for 15 min at 4°C. After determination of protein concentration using a BCA assay (Thermo, Waltham, MA) the individual lysates (500 µg each) are reduced with DTT, alkylated with iodoacetamide, and proteolytically digested with the protease Lys-C (1:100, w/w) in 8M urea for 4h at 37°C. Samples were then diluted to 2M urea with 50 mM ammonium bicarbonate and further digested with trypsin (1:75, w/w) overnight at 37°C<sup>3, 4</sup>. The resulting peptide digests are desalted and dimethyl-labelled “on column”<sup>5</sup>. Control (WT) mice derived peptides are labelled “light”, whereas *Jnk*<sup>Δhepa</sup> mice derived peptides were labelled “heavy”. The labelled peptide digests are mixed in a 1:1 ratio, dried down and resuspended in 1 M glycolic acid in 80% ACN, 5% TFA). Phosphopeptide enrichment was performed using MagReSyn® Ti-IMAC beads (ReSyn Biosciences, Gauteng, South Africa) according to the manufacturer’s instructions. Samples were then analysed on a nanoLC-MS/MS System (LC: Ultimate 3000 (Dionex, Dreieich, Germany); MS: Orbitrap Elite

(Thermo)). The raw data obtained from the mass spectrometer were processed and quantified with MaxQuant (version 1.4.1.2). The relevant MS and MS/MS spectra were searched against a forward-decoy Swissprot Homo sapiens database (version 09/2014).

#### *Transplantation of bone marrow-derived cells*

We transferred bone marrow from *Jnk* <sup>$\Delta$ hepa</sup> and control (WT) mice into 6 week-old *Jnk* <sup>$\Delta$ hepa</sup> and control isogeneic recipients (n=6-7 mice per group) after ablative  $\gamma$ -irradiation, as described previously<sup>6</sup>. Two months after BMT mice were subjected to either 4 weeks treatment with CCl<sub>4</sub> (0.6 mL/kg body weight, diluted in corn oil, injected intraperitoneally every 3 days) or BDL. At this time, mice were sacrificed and samples collected.

#### *Serum parameters*

Alanine aminotransferase (ALT), aspartate aminotransferase (AST), bilirubin and alkaline phosphatase (AP) activity (UV test at 37°C) were measured in the Central Laboratory Facility at University Hospital RWTH Aachen according to standard procedures.

## SUPPLEMENTARY TABLES AND FIGURES

**Supplementary Table 1.** Origin and clinical features of liver samples from patients with DILI. (f: female; m: male; Bili: total bilirubin; GLDH: glutamate dehydrogenase; TPT: prothrombin time; INR: international normalized ratio;  $\alpha$ PTT: activated partial thromboplastin time; NSAID: non-steroidal anti-inflammatory drug).

**Supplementary Figure 1. (A)** Activation of pJNK in liver samples of patient samples of normal liver human tissue (C3, C4). **(B+C)** PCR blots of tail DNA from *Wt* and *Jnk1 $\Delta$ hepa* (upper panel) and control (*Wt*), *Jnk2<sup>-/-</sup>*, and *Jnk $\Delta$ hepa* (lower panel) mice confirmed the respective phenotype of interest.

**Supplementary Figure 2. (A+B)** A basal study of untreated female (♀) and male (♂) 8-week-old control (*Wt*) or *Jnk $\Delta$ hepa* mice was performed. Representative macroscopic view of livers (scale bars: 10mm) and H&E staining of liver sections (scale bars 100 $\mu$ m) from each mice group is shown. **(C+D)** Serum AST and ALT was represented in a graph. **(E+F)** Liver weight (LW) and body weight of these mice is shown, and the liver *versus* body weight ratio (%LW/BW) calculated.

**Supplementary Figure 3. (A)** Control (*Wt*), *Jnk1 $\Delta$ hepa* and *Jnk $\Delta$ hepa* mice were injected with APAP for 8h and sacrificed. The liver *versus* body weight ratio (%LW/BW) was then calculated. **(B)** Isoprostanes, indicators of lipid peroxides were measured in livers of 8h APAP-treated control (*Wt*) and *Jnk $\Delta$ hepa* mice, and represented as pg/ml. **(C)** Densitometry analysis of the protein expression levels of P38 was performed in these mice and represented as arbitrary units of fluorescence (AUF).

**Supplementary Figure 4. (A)** Control (*Wt*) or *Jnk $\Delta$ hepa* mice were injected with GalN and 30 min later with LPS. 8h thereafter mice were sacrificed. **(B)** Survival curve of

control (*Wt*) or *Jnk* <sup>$\Delta$ hepa</sup> mice treated with GalN+LPS and sacrificed 8h later. **(C)** Serum levels of AST, ALT and GLDH were determined after GalN+LPS-treated control (*Wt*) or *Jnk* <sup>$\Delta$ hepa</sup> mice. **(D)** Macroscopic (upper panel; Scale bars: 10mm) and microscopic (lower panel; Scale bars: 100 $\mu$ m) appearance of control (*Wt*) or *Jnk* <sup>$\Delta$ hepa</sup> mice after 8h GalN+LPS treatment **(E)** The percentage of liver vs body weight ratio was calculated and represented in a graph.

**Supplementary Figure 5.** **(A)** Representative macroscopic view of control (*Wt*), *Jnk2*<sup>-/-</sup> and *Jnk* <sup>$\Delta$ hepa</sup> livers, 28 days after repeated injections of CCl<sub>4</sub>. Corn-oil injections were used as controls. **(B)** Representative Sirius red staining of paraffin sections from the same livers. **(C+D)** Quantification of Sirius red and CollagenIA1 stainings were performed using Image J<sup>®</sup> Software and represented as percentage of area fraction. **(E)** Densitometry analysis of the protein expression levels of  $\alpha$ SMA was performed in these mice and represented as arbitrary units of fluorescence (AUF). **(F)** mRNA levels of *Timp1* and *Mmp2* were determined by qRT-PCR in liver tissues of (n=5-10). Data are expressed as mean $\pm$ SEM (\*p<0.05; \*\*p<0.01; \*\*\*p<0.001).

**Supplementary Figure 6.** Control (*Wt*), *Jnk2*<sup>-/-</sup> and *Jnk* <sup>$\Delta$ hepa</sup> livers were subjected for 4 weeks of repeated CCl<sub>4</sub> injections. **(A)** mRNA levels of *Pcna* were determined by qRT-PCR in liver tissues (n=6-8; \*\*p<0.01). **(B)** Densitometry analysis of the protein expression levels of PCNA and CyclinD was performed in these mice and represented as arbitrary units of fluorescence (AUF).

**Supplementary Figure 7.** The inflammatory profile is increased in absence of JNK in hepatocytes. **(A)** Representative CD11b staining performed on frozen liver sections of control (*Wt*), *Jnk2*<sup>-/-</sup> and *Jnk* <sup>$\Delta$ hepa</sup> livers after 4 weeks of repeated CCl<sub>4</sub> injections.

Scale bars: 100 $\mu$ m. Quantification of positive cells was performed in 7-10 view-fields. **(B)** Representative F4/80 staining performed on frozen liver sections of the same livers. Scale bars: 100 $\mu$ m. Quantification of F4/80 positive cells per view field is shown. mRNA levels of *IL1 $\alpha$*  **(C)**, *IL1 $\beta$*  **(D)**, *Mcp1* **(E)** and *Tnf $\alpha$*  **(F)** were determined by qRT-PCR in liver tissue (n=6-8). Data are expressed as mean $\pm$ SEM (\*p<0.05; \*\*p<0.01; \*\*\*p<0.001).

**Supplementary Figure 8.** Venny diagram shows comparative gene expression overlap in untreated 8 week-old control (*Wt*) and *Jnk $\Delta$ <sup>hepa</sup>* livers and primary hepatocytes. **(A)** Up-regulated genes. **(B)** Down-regulated genes. **(C+D)** Validation of gene array analysis by mRNA expression was performed in liver tissue and primary hepatocytes of 8 week-old untreated control (*Wt*), *Jnk1 $\Delta$ <sup>hepa</sup>* and *Jnk $\Delta$ <sup>hepa</sup>* mice. The mRNA expression levels *Bad* and *Jnk2* are shown (\*p<0.05; \*\*p<0.01; \*\*\*p<0.001).

**Supplementary Figure 9. (A)** Primary hepatocytes were isolated from control (*Wt*), *Jnk2<sup>-/-</sup>* and *Jnk $\Delta$ <sup>hepa</sup>* mice. A total number of 500.000 cells were seeded in 6-well plates and cultivated for up to 48h. Visible light microphotographs were taken in untreated hepatocytes. Scale bars: 100 $\mu$ m. **(B)** Representative TUNEL stainings of primary hepatocytes. Dead cells are stained green; total cells were counter-stained with DAPI (blue). Scale bars: 100 $\mu$ m. **(C)** Staining for BrdU was performed in coverslips and counterstained to DAPI (blue). Scale bars: 100 $\mu$ m. **(D)** BrdU-positive cells were counted in untreated control (*Wt*) and *Jnk $\Delta$ <sup>hepa</sup>* hepatocytes, and displayed in a graph.

**Supplementary Figure 10.** Primary hepatocytes were isolated from control (*Wt*) and *Jnk $\Delta$ <sup>hepa</sup>* mice. A total number of 500.000 cells were seeded in 6-well plates and cultivated for up to 12h. **(A)** Reactive oxygen species (ROS) were measured in

presence or absence of APAP and/or SP600125, an inhibitor of the JNK pathway. **(B)** Annexin V (green)/Ethidium Homodimer III (red)/DAPI (blue) was performed and microphotographs were taken. **(C)** Quantification of the double Annexin V/Ethidium Homodimer III/ DAPI-positive cells was graphed. Values are mean $\pm$ SEM from at least 6 mice per group (\*p<0.05; \*\*p<0.01).

**Supplementary Figure 11. (A)** Hepatocytic protein extracts from 8h-APAP-treated control (*Wt*) and *Jnk* <sup>$\Delta$ hepa</sup> primary hepatocytes were labelled with beads, digested with trypsin, and the phosphopeptides were enriched, and analyzed using mass spectrometry. **(B)** The expression of phosphoMAPK/CDK substrates was assessed in untreated and 8h-APAP-treated control (WT) and *Jnk* <sup>$\Delta$ hepa</sup> primary hepatocytes. Potential target proteins of JNK with matching molecular weights are displayed on the right. Values are mean $\pm$ SEM from at least 6 mice per group (\*\*p<0.01 and \*\*\*p<0.001).

## SUPPLEMENTARY REFERENCES

1. Gentleman RC, Carey VJ, Bates DM, Bolstad B, Dettling M, Dudoit S, Ellis B, Gautier L, Ge Y, Gentry J, Hornik K, Hothorn T, Huber W, Iacus S, Irizarry R, Leisch F, Li C, Maechler M, Rossini AJ, Sawitzki G, Smith C, Smyth G, Tierney L, Yang JY, Zhang J. Bioconductor: open software development for computational biology and bioinformatics. *Genome Biol* 2004;5:R80.
2. Dai M, Wang P, Boyd AD, Kostov G, Athey B, Jones EG, Bunney WE, Myers RM, Speed TP, Akil H, Watson SJ, Meng F. Evolving gene/transcript definitions significantly alter the interpretation of GeneChip data. *Nucleic Acids Res* 2005;33:e175.
3. Preisinger C, Schwarz JP, Bleijerveld OB, Corradini E, Muller PJ, Anderson KI, Kolch W, Scholten A, Heck AJ. Imatinib-dependent tyrosine phosphorylation profiling of Bcr-Abl-positive chronic myeloid leukemia cells. *Leukemia* 2013;27:743-6.
4. Scholten A, Preisinger C, Corradini E, Bourgonje VJ, Hennrich ML, van Veen TA, Swaminathan PD, Joiner ML, Vos MA, Anderson ME, Heck AJ. Phosphoproteomics study based on in vivo inhibition reveals sites of calmodulin-dependent protein kinase II regulation in the heart. *J Am Heart Assoc* 2013;2:e000318.
5. Boersema PJ, Raijmakers R, Lemeer S, Mohammed S, Heck AJ. Multiplex peptide stable isotope dimethyl labeling for quantitative proteomics. *Nat Protoc* 2009;4:484-94.

6. **Berres ML, Koenen RR**, Rueland A, Zaldivar MM, Heinrichs D, Sahin H, Schmitz P, Streetz KL, Berg T, Gassler N, Weiskirchen R, Proudfoot A, Weber C, Trautwein C, Wasmuth HE. Antagonism of the chemokine Ccl5 ameliorates experimental liver fibrosis in mice. J Clin Invest;120:4129-40.

**Author names in bold designate shared co-first authors**

Suppl. Table I

| # | Sex | Age | Etiology      | AST   | ALT  | Bili  | GLDH   | AP  | GGT | TPT | INR  | αPTT  | Creatine | Phosphate |
|---|-----|-----|---------------|-------|------|-------|--------|-----|-----|-----|------|-------|----------|-----------|
|   |     |     |               | U/l   | U/l  | mg/dl | U/l    | U/l | U/l | %   |      | sec   | mg/dl    | mg/dl     |
| 1 | f   | 50  | Paracetamol   | 16253 | 4320 | 3.90  | 622.60 | 86  | 447 | 17  | 3.39 | 56.50 | 1.01     | -         |
| 2 | f   | 23  | Phenprocoumon | 215   | 154  | 3.20  | -      | 63  | 216 | 42  | 1.73 | 48.00 | 0.94     | 3.80      |
| 3 | m   | 48  | Autoimmune    | 1004  | 1068 | 28.50 | 18.50  | 141 | 148 | 48  | 1.44 | 31.70 | 0.56     | 2.50      |
| 4 | f   | 63  | NSAID         | 189   | 209  | 4.30  | 10.60  | 85  | 38  | 24  | 2.73 | 56.40 | 0.87     | 3.00      |

Origin and clinical features of liver samples from patients with DILI. (f: female; m: male; Bili: total bilirubin; GLDH: glutamate dehydrogenase; TPT: prothrombin time; INR: international normalized ratio; αPTT: activated partial thromboplastin time; NSAID: non-steroidal anti-inflammatory drug).

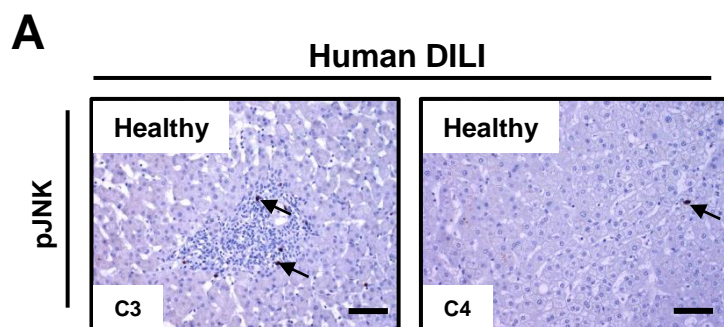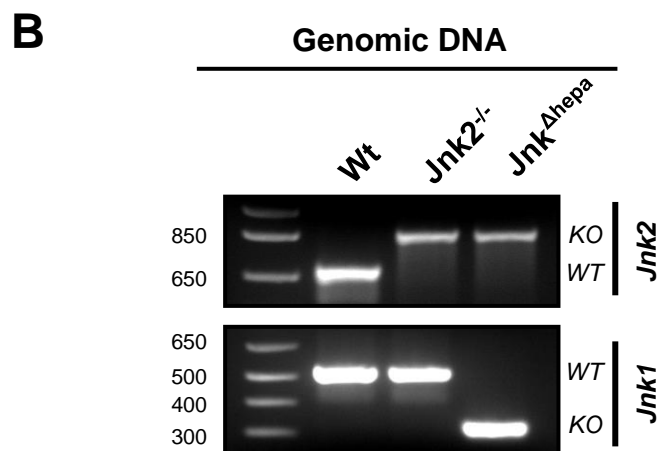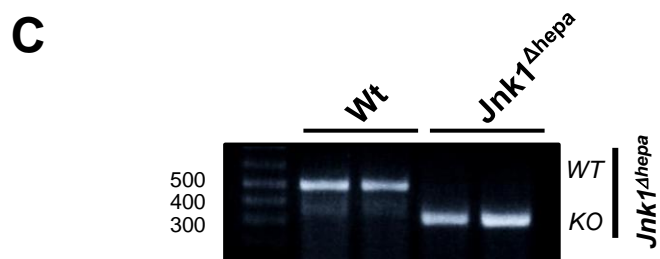

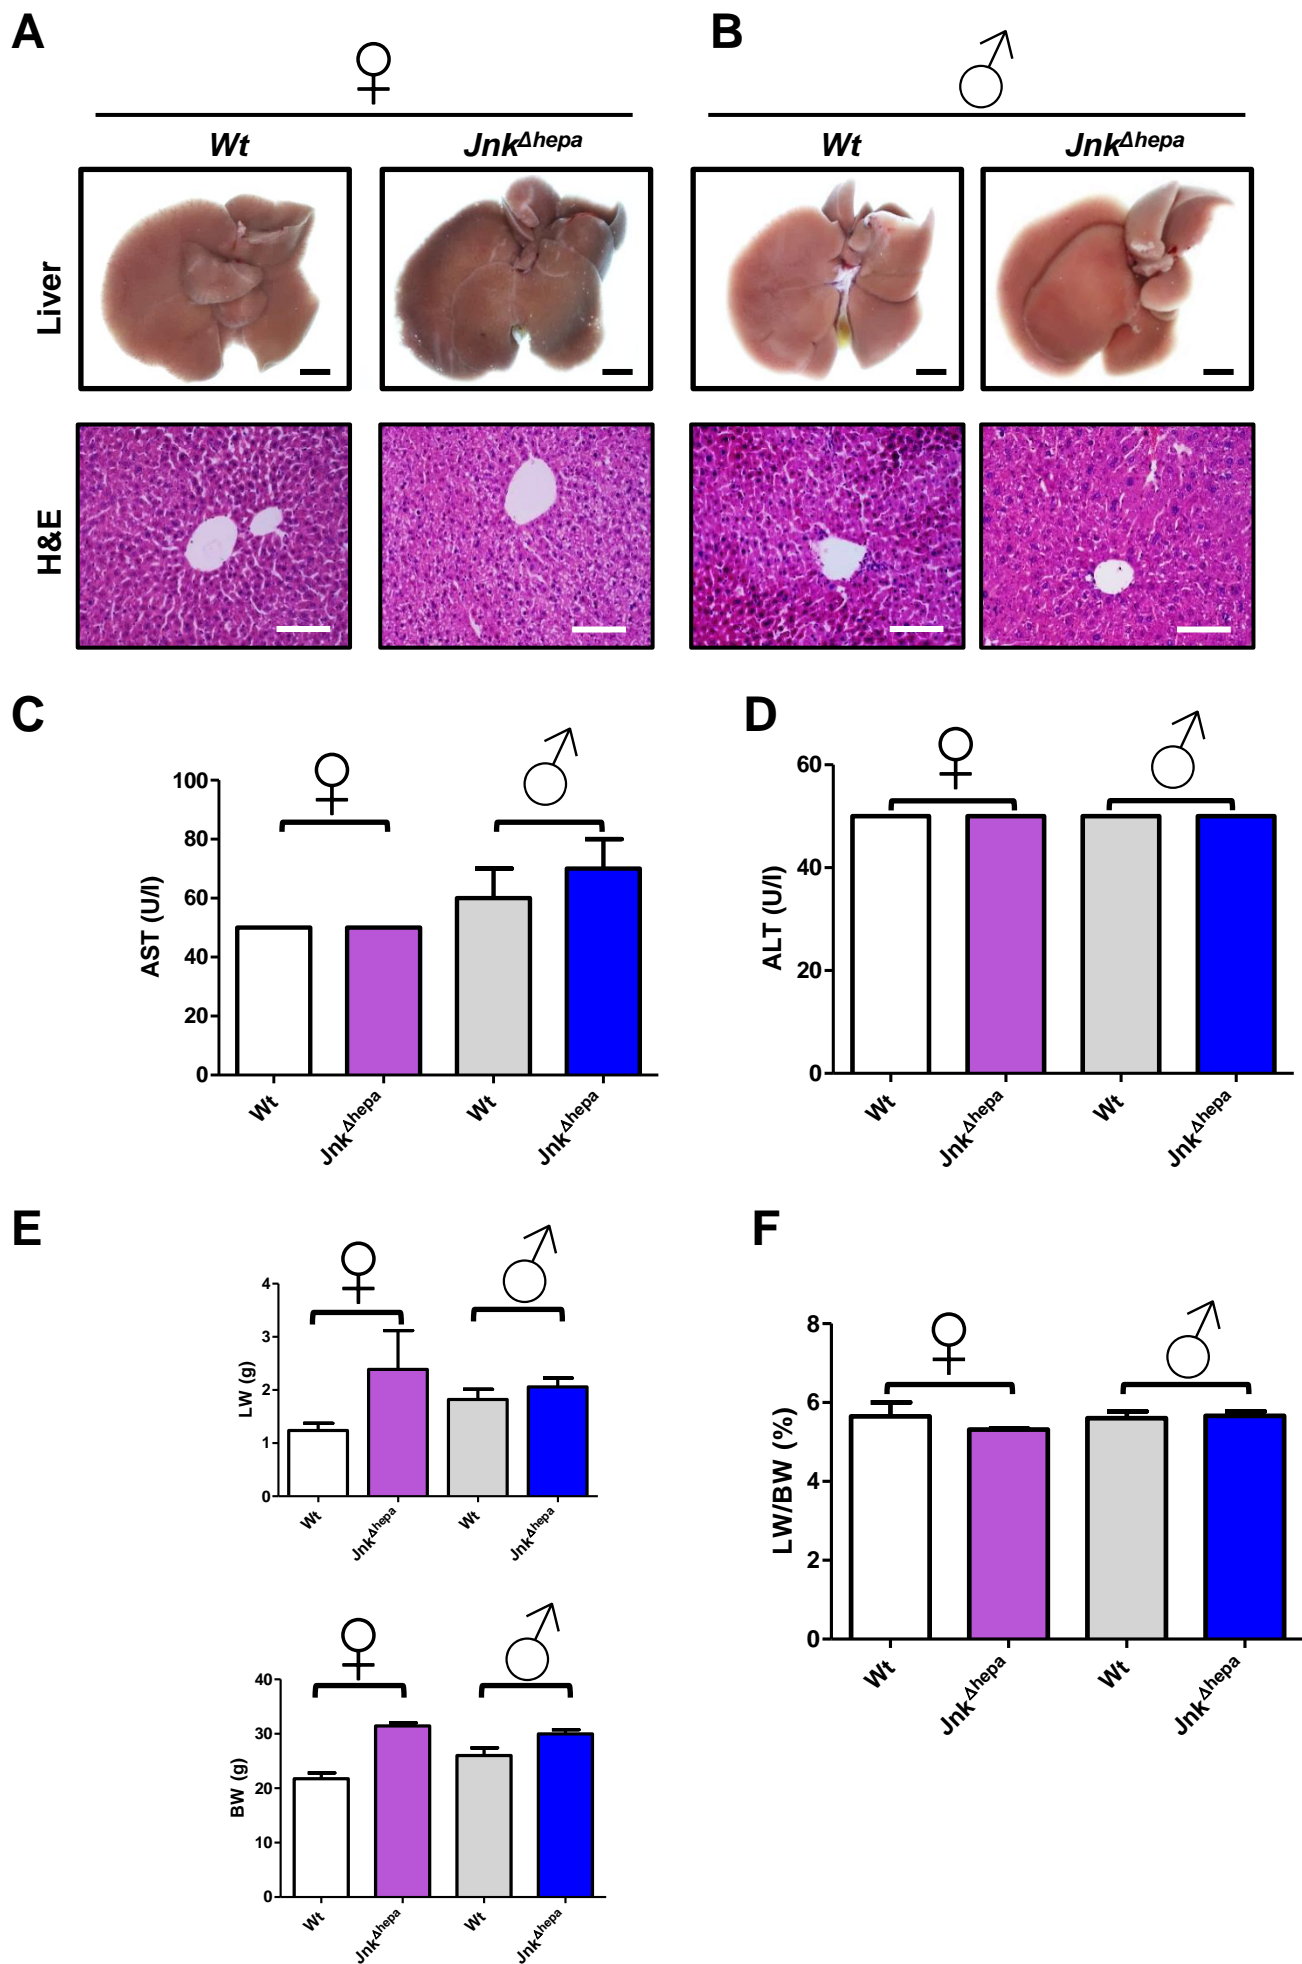

Suppl. Fig. 2

**A**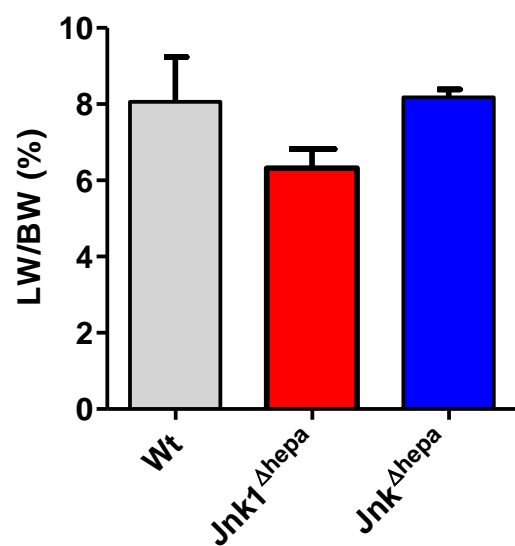**B**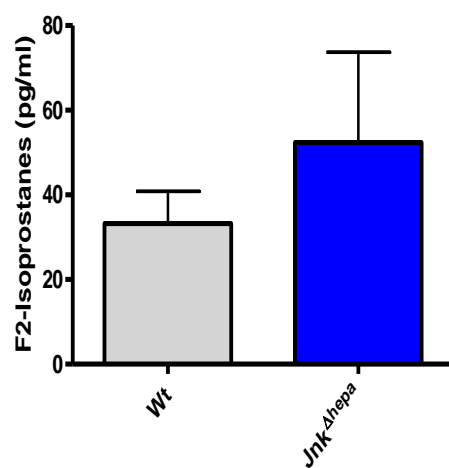**C**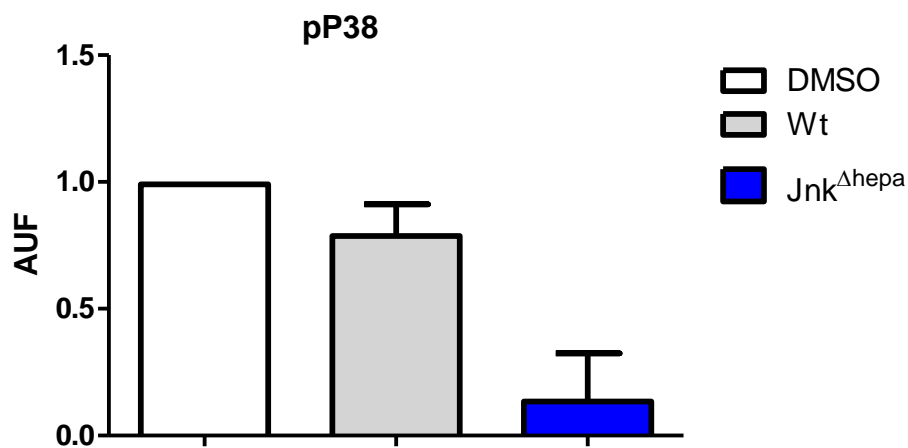

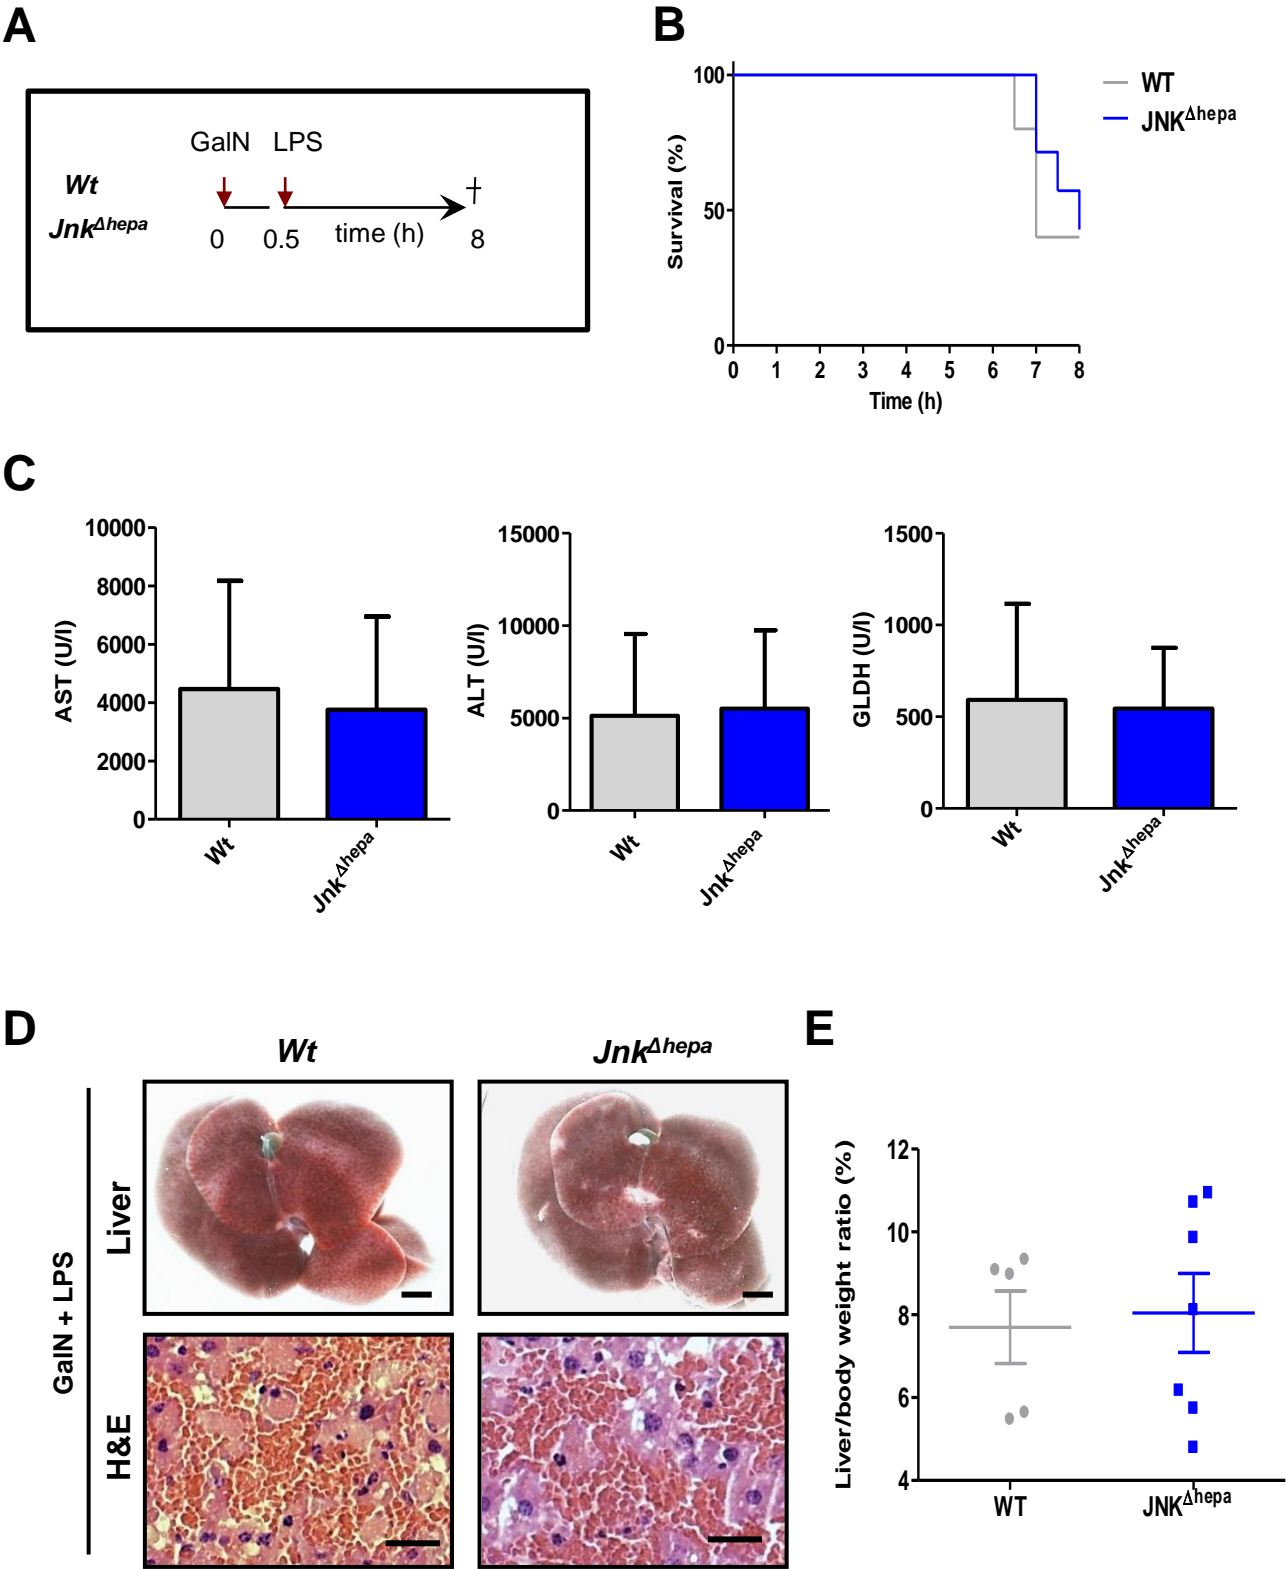

Suppl. Fig. 4

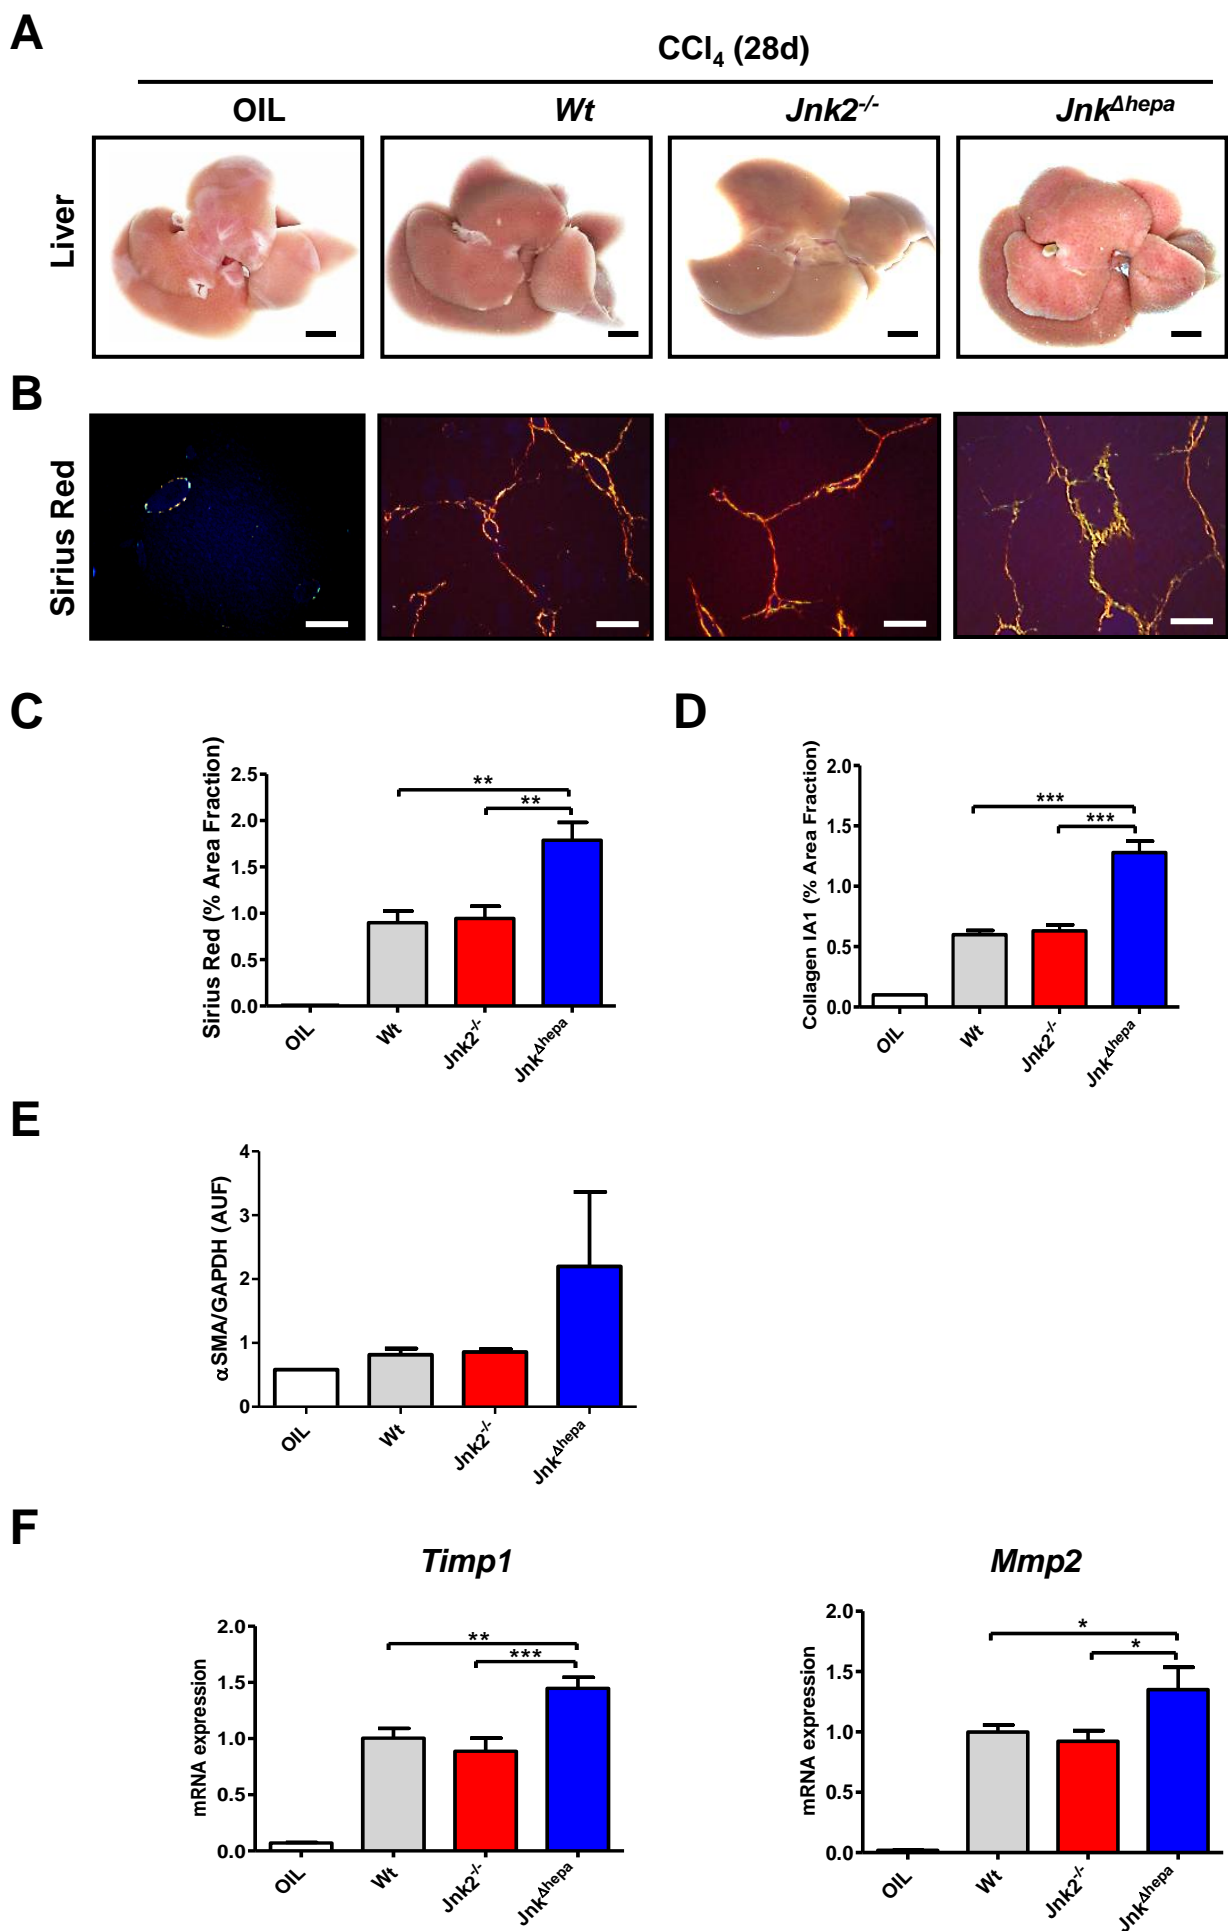

Suppl. Fig. 5

**A**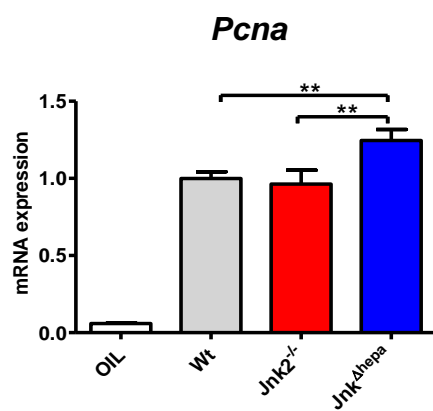**B**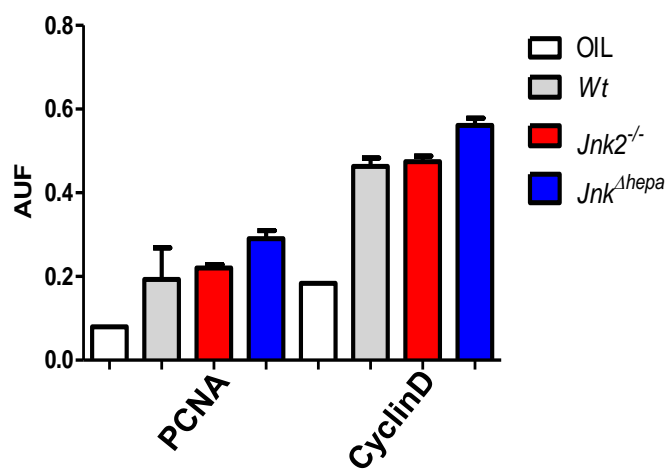

**A**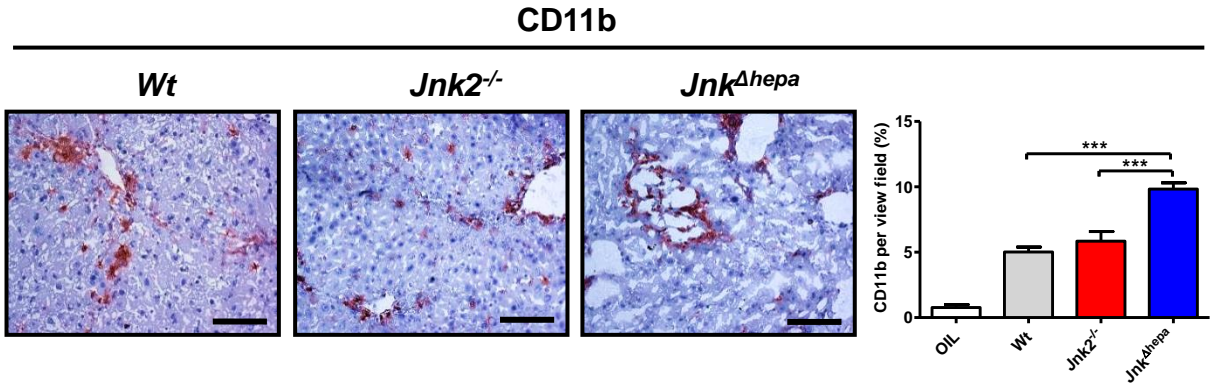**B**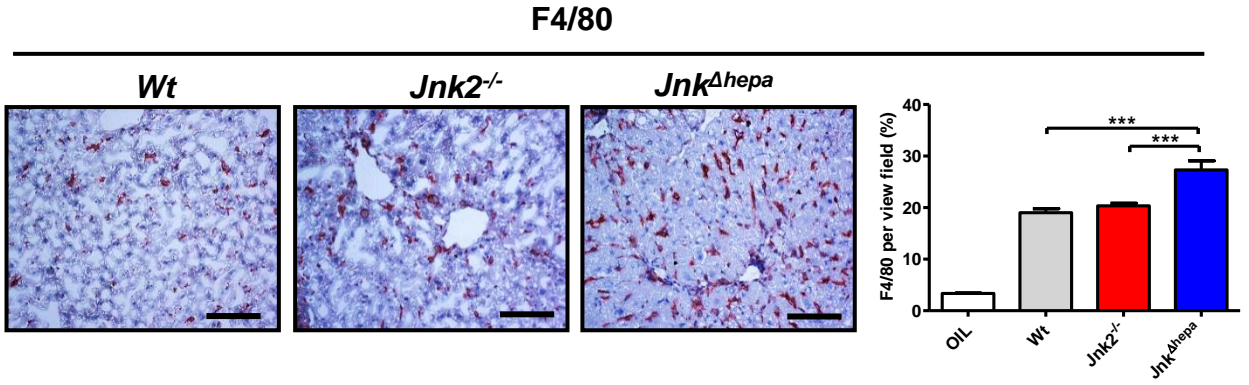**C**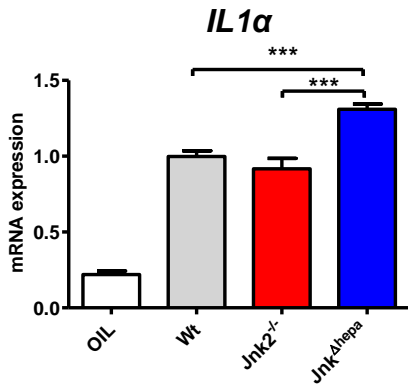**D**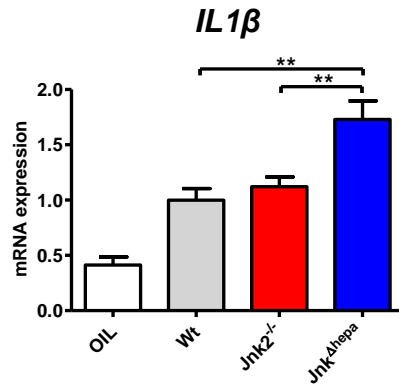**E**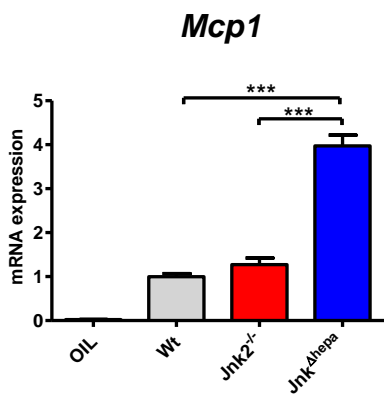**F**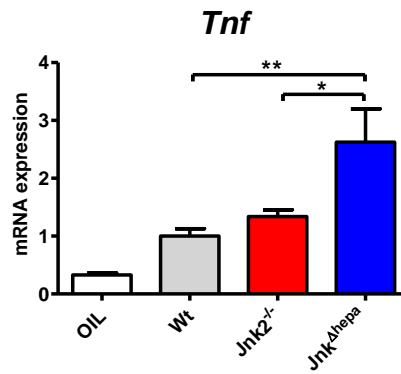**Suppl. Fig. 7**

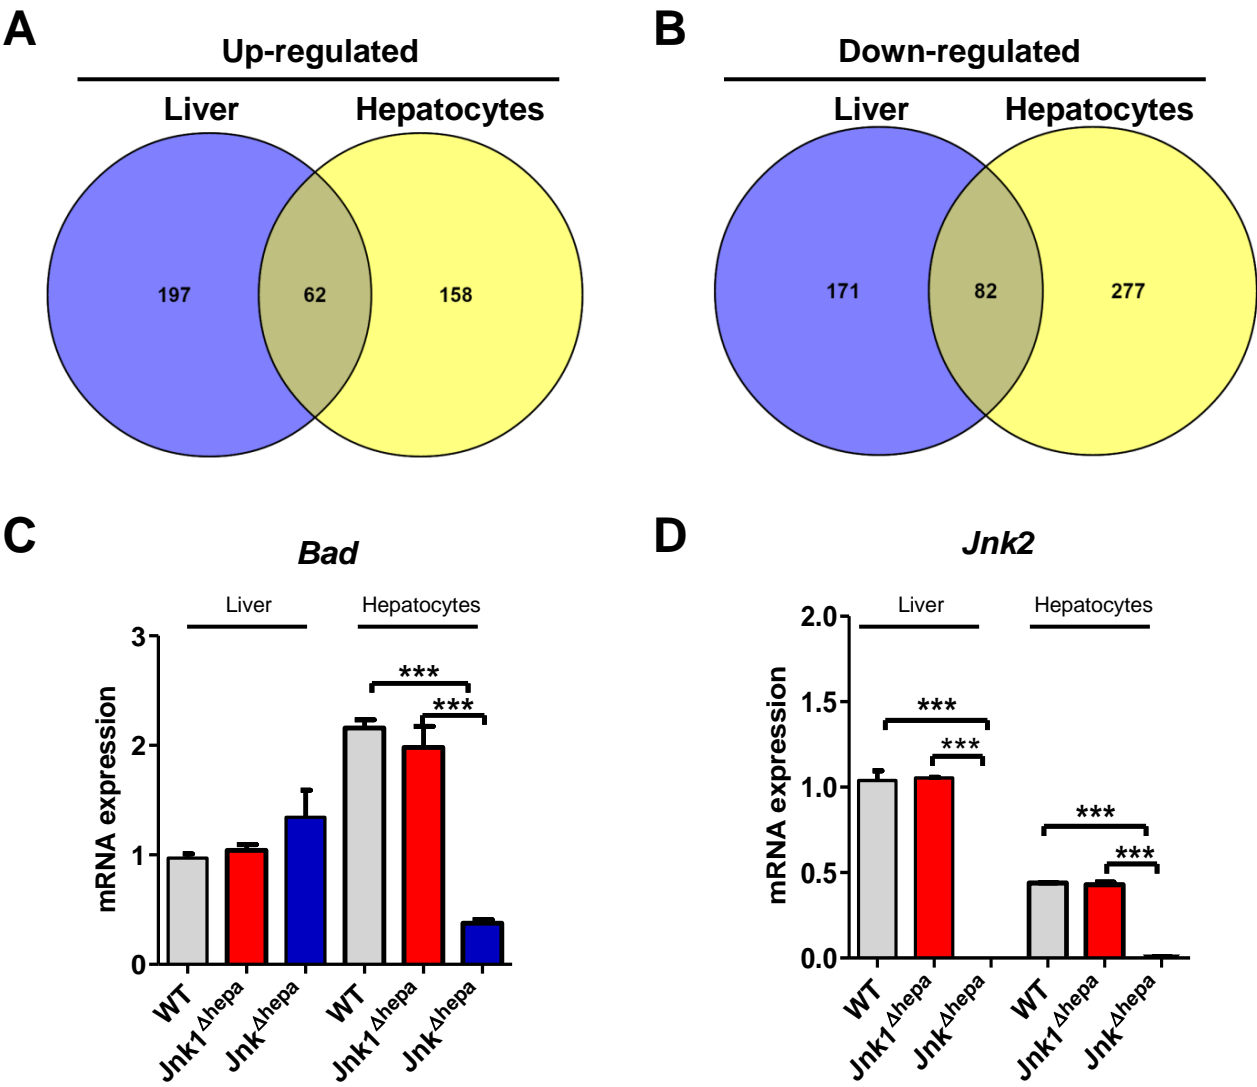

Suppl. Fig. 8

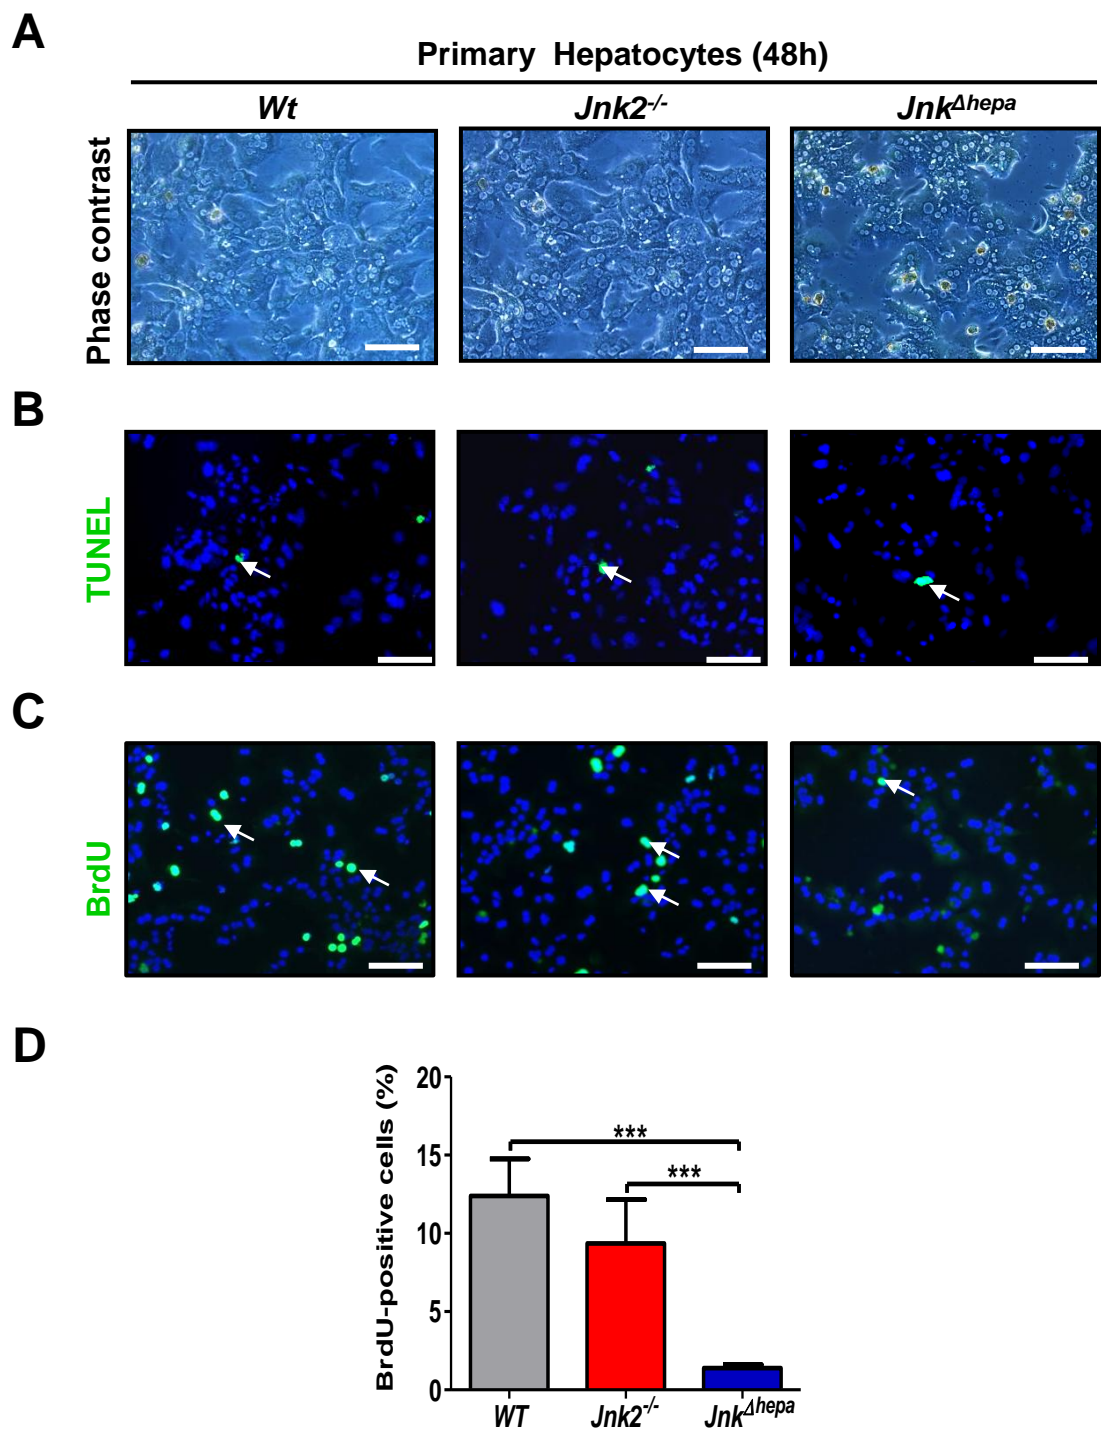

Suppl. Fig. 9

**A**

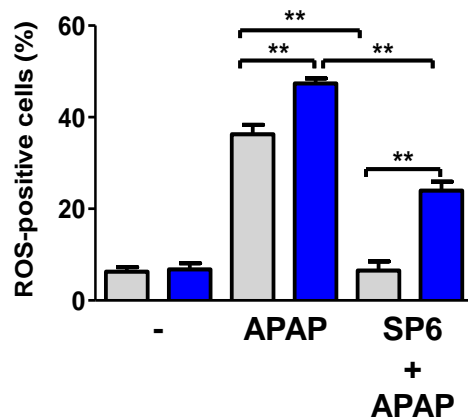

**B**

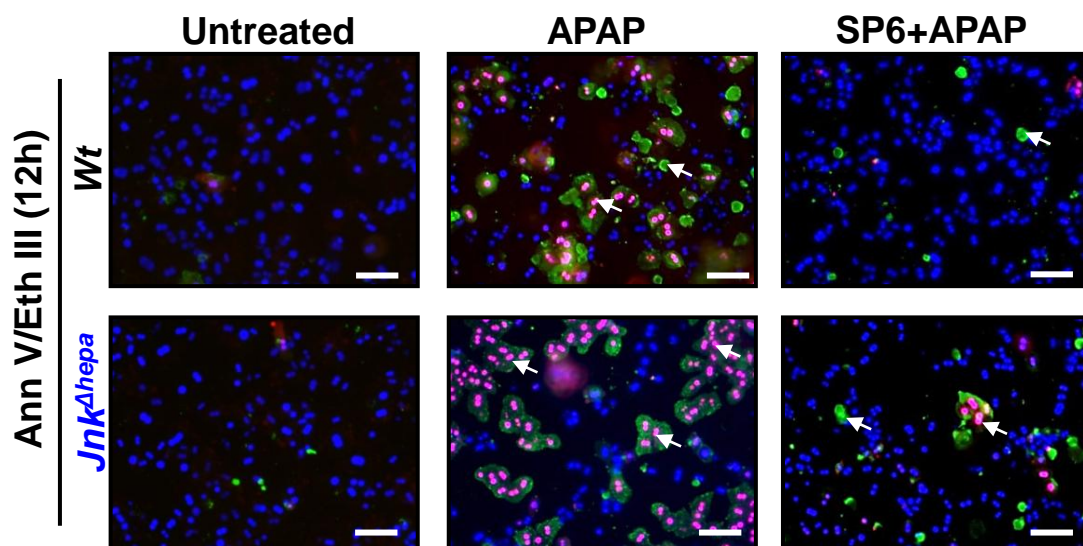

**C**

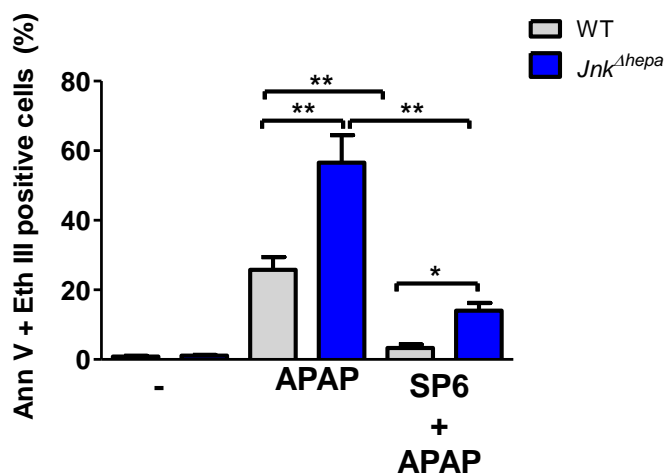

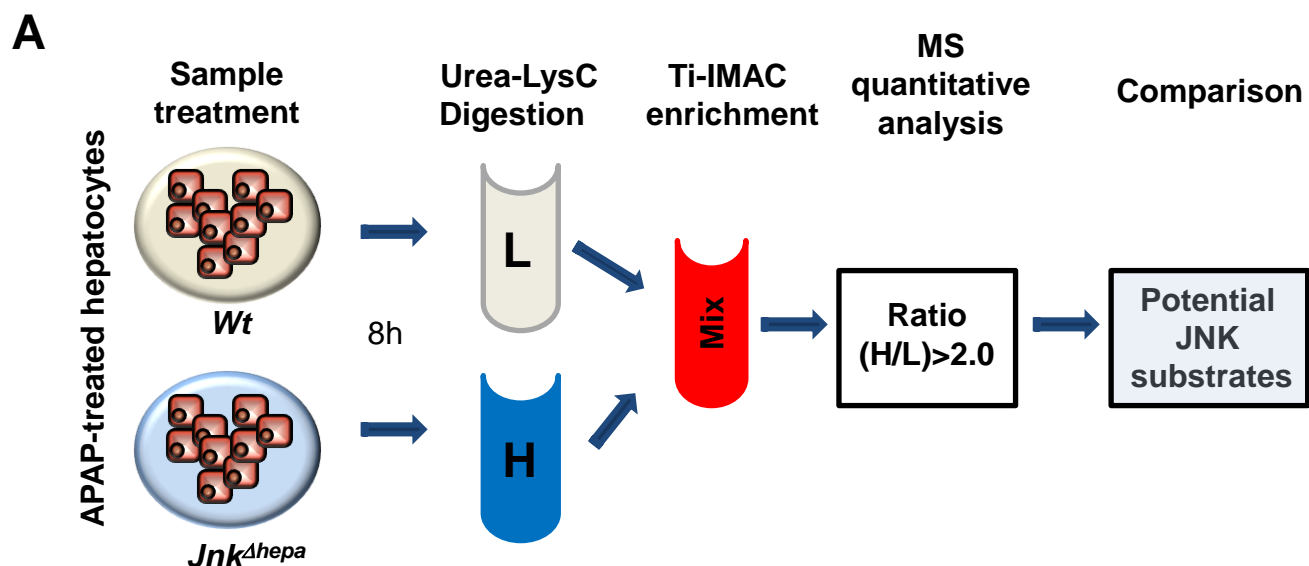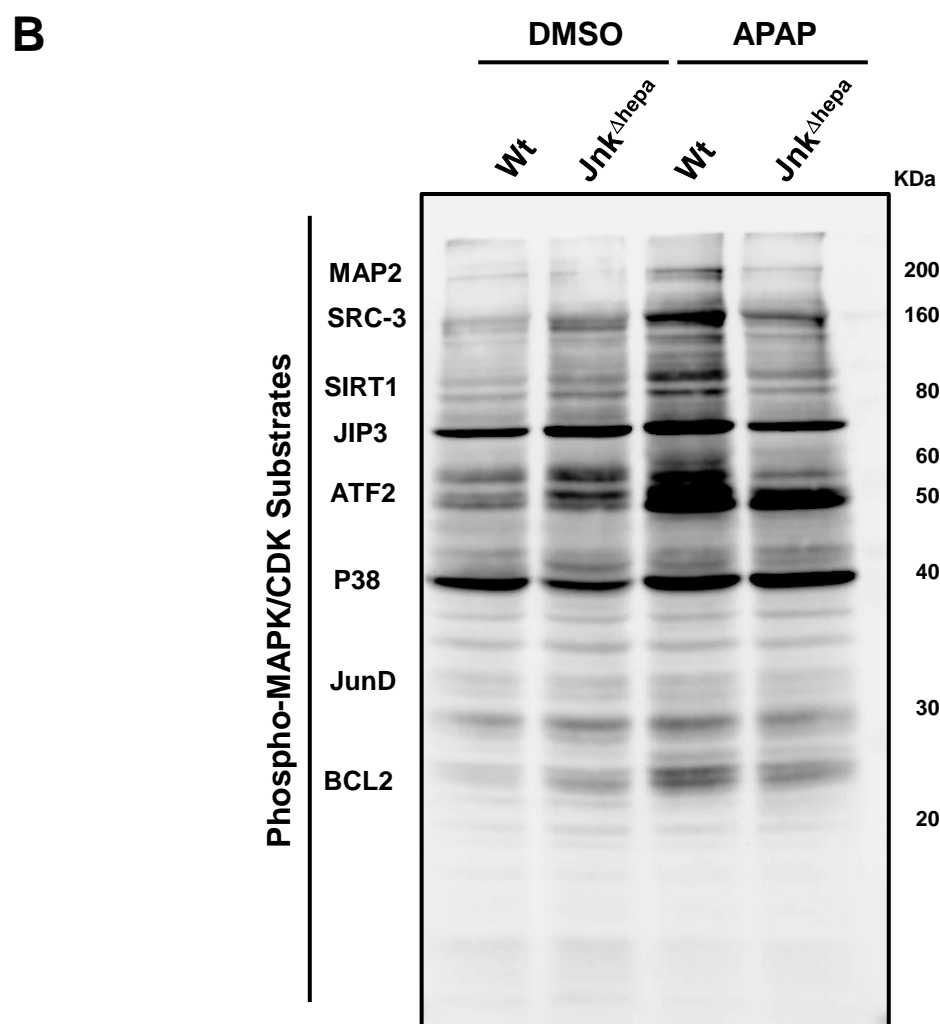

Suppl. Fig. 11
